# Supplementary material
Source: HighWire-hosted journal article supplement (http://www.ajnr.org/highwire/filestream/52360/field_highwire_adjunct_files/0/3460_materialsV2.pdf)
Supplement: 3460_materialsV2.pdf [file 3460_materialsV2.pdf]

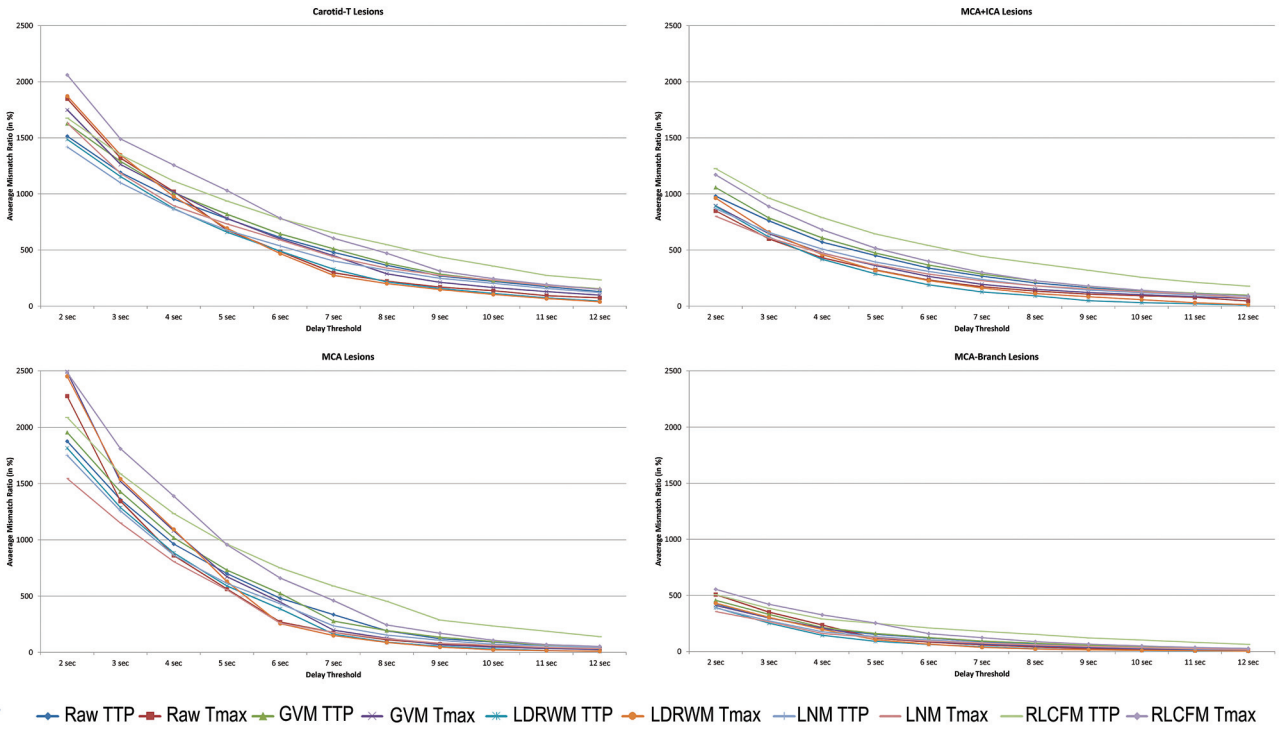

**ON-LINE FIG 1.** Average PWI-DWI mismatch ratios determined by the different TTP/Tmax estimation methods stratified for occlusion type.

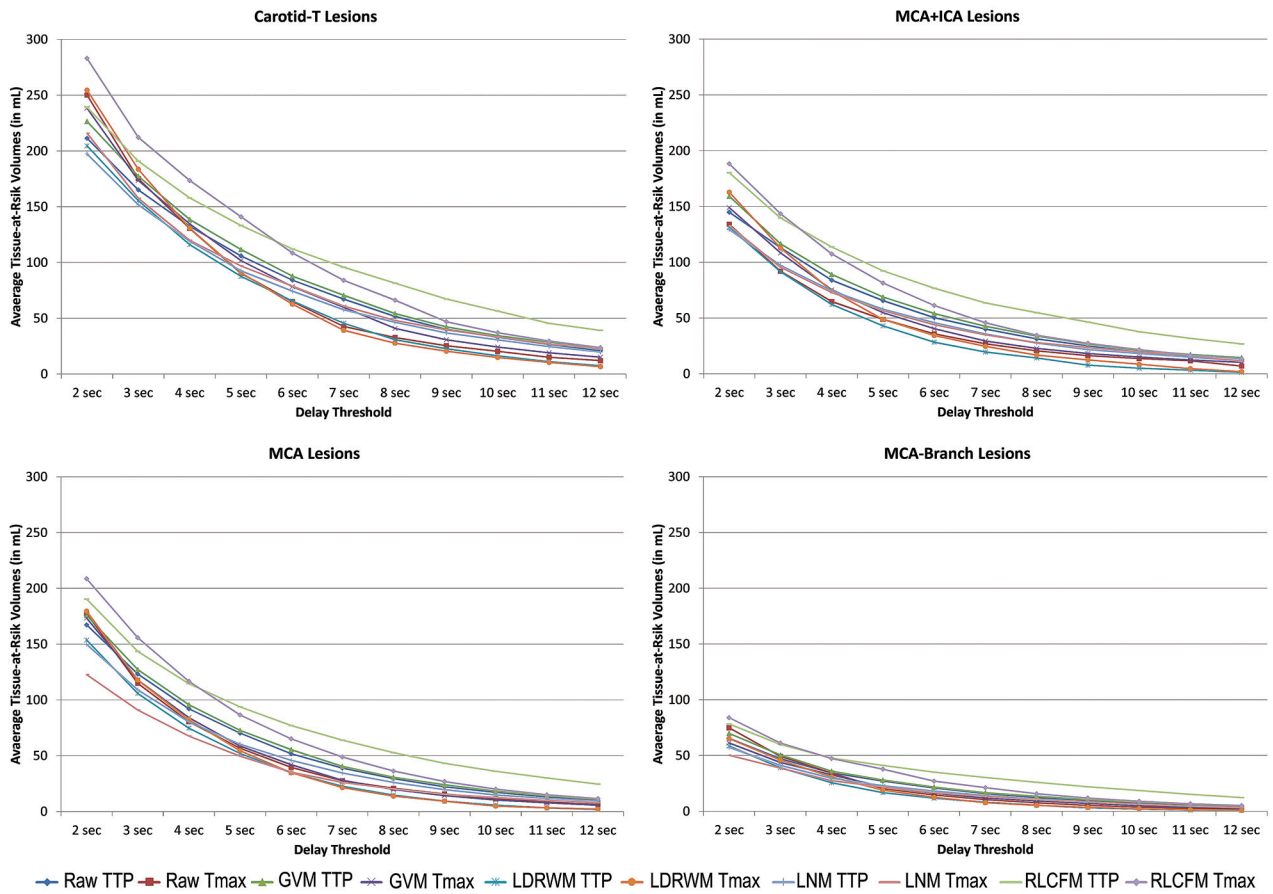

**ON-LINE FIG 2.** Average tissue-at-risk volumes determined by the different TTP/Tmax estimation methods stratified for occlusion type.

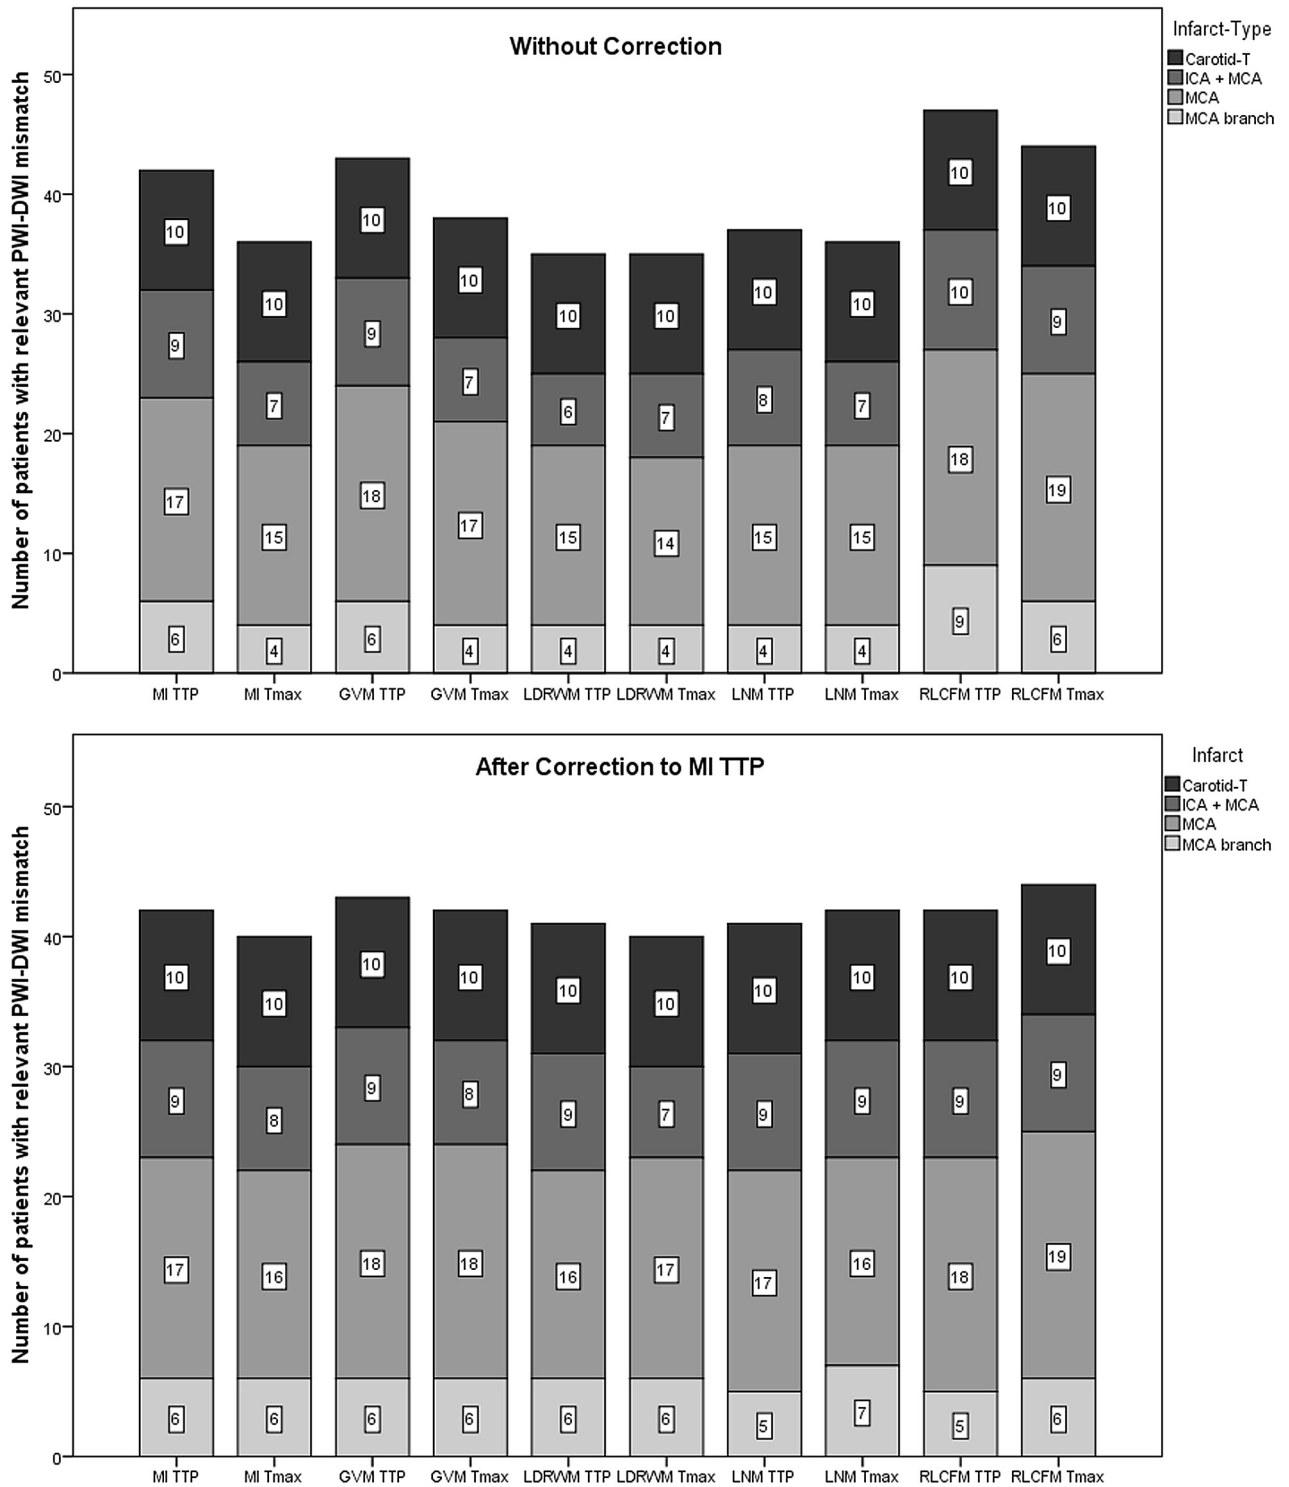

**ON-LINE FIG 3.** Number of patients with a relevant PWI-DWI mismatch before (top) and after correction to the model-independent TTP estimation technique (bottom). MI indicates model independent.

**On line-Table: Parameters for the correction formulas for intermodel adaption (top right) and associated nonlogarithmized standard errors  $\sigma$  (bottom left)**

| $V_R \setminus V_T$ | Raw TTP                                                   | Raw Tmax                                                 | GVM TTP                                                   | GVM Tmax                                                 | LDRWM TTP                                                | LDRWM Tmax                                               | LNМ TTP                                                  | LNМ Tmax                                                 | RLCFM TTP                                                | RLCFM Tmax                                               |
|---------------------|-----------------------------------------------------------|----------------------------------------------------------|-----------------------------------------------------------|----------------------------------------------------------|----------------------------------------------------------|----------------------------------------------------------|----------------------------------------------------------|----------------------------------------------------------|----------------------------------------------------------|----------------------------------------------------------|
| Raw TTP             |                                                           | A = 1.154<br>B = 0.797<br>C = -0.031<br>$\sigma$ = 3.570 | A = 0.021<br>B = 0.989<br>C = -0.008<br>$\sigma$ = 0.850  | A = 1.154<br>B = 0.797<br>C = -0.041<br>$\sigma$ = 3.350 | A = 1.505<br>B = 0.721<br>C = -0.027<br>$\sigma$ = 2.750 | A = 1.270<br>B = 0.746<br>C = -0.007<br>$\sigma$ = 3.749 | A = 0.563<br>B = 0.931<br>C = -0.029<br>$\sigma$ = 1.461 | A = 1.152<br>B = 0.849<br>C = -0.062<br>$\sigma$ = 3.601 | A = 0.266<br>B = 0.951<br>C = -0.095<br>$\sigma$ = 2.753 | A = 0.345<br>B = 0.891<br>C = -0.028<br>$\sigma$ = 3.489 |
| Raw Tmax            | A = 0.401<br>B = 0.918<br>C = -0.071<br>$\sigma$ = 4.730  |                                                          | A = 0.444<br>B = 0.904<br>C = -0.079<br>$\sigma$ = 4.464  | A = 0.551<br>B = 0.899<br>C = -0.048<br>$\sigma$ = 2.676 | A = 0.852<br>B = 0.830<br>C = -0.025<br>$\sigma$ = 3.980 | A = 0.245<br>B = 0.918<br>C = 0.023<br>$\sigma$ = 2.821  | A = 0.438<br>B = 0.945<br>C = -0.068<br>$\sigma$ = 4.677 | A = 0.802<br>B = 0.907<br>C = -0.087<br>$\sigma$ = 4.234 | A = 1.132<br>B = 0.784<br>C = -0.180<br>$\sigma$ = 6.513 | A = 0.595<br>B = 0.838<br>C = -0.087<br>$\sigma$ = 3.347 |
| GVM TTP             | A = 0.056<br>B = 0.996<br>C = 0.003<br>$\sigma$ = 0.887   | A = 1.220<br>B = 0.792<br>C = -0.029<br>$\sigma$ = 3.591 |                                                           | A = 1.184<br>B = 0.798<br>C = -0.036<br>$\sigma$ = 3.357 | A = 1.568<br>B = 0.717<br>C = -0.025<br>$\sigma$ = 2.827 | A = 1.345<br>B = 0.739<br>C = -0.006<br>$\sigma$ = 3.795 | A = 0.595<br>B = 0.932<br>C = -0.024<br>$\sigma$ = 1.644 | A = 1.209<br>B = 0.845<br>C = -0.059<br>$\sigma$ = 3.730 | A = 1.348<br>B = 0.750<br>C = -0.003<br>$\sigma$ = 2.743 | A = 0.401<br>B = 0.973<br>C = -0.025<br>$\sigma$ = 4.536 |
| GVM Tmax            | A = 0.096<br>B = 0.973<br>C = -0.041<br>$\sigma$ = 4.298  | A = 0.274<br>B = 0.950<br>C = -0.007<br>$\sigma$ = 2.569 | A = 0.100<br>B = 0.966<br>C = -0.048<br>$\sigma$ = 4.039  |                                                          | A = 0.838<br>B = 0.833<br>C = -0.013<br>$\sigma$ = 3.750 | A = 0.086<br>B = 0.946<br>C = 0.046<br>$\sigma$ = 1.840  | A = 0.260<br>B = 0.979<br>C = -0.046<br>$\sigma$ = 4.275 | A = 0.574<br>B = 0.952<br>C = -0.062<br>$\sigma$ = 3.220 | A = 2.527<br>B = 0.545<br>C = -0.049<br>$\sigma$ = 4.613 | A = 1.343<br>B = 0.815<br>C = -0.049<br>$\sigma$ = 2.662 |
| LDRWM TTP           | A = 1.083<br>B = 0.809<br>C = -0.152<br>$\sigma$ = 2.896  | A = 1.154<br>B = 0.804<br>C = -0.119<br>$\sigma$ = 2.985 | A = 1.115<br>B = 0.797<br>C = -0.159<br>$\sigma$ = 2.774  | A = 1.382<br>B = 0.762<br>C = -0.143<br>$\sigma$ = 2.918 |                                                          | A = 0.924<br>B = 0.813<br>C = -0.068<br>$\sigma$ = 2.898 | A = 1.220<br>B = 0.813<br>C = -0.156<br>$\sigma$ = 2.984 | A = 1.682<br>B = 0.752<br>C = -0.182<br>$\sigma$ = 3.715 | A = 3.152<br>B = 0.424<br>C = -0.069<br>$\sigma$ = 4.464 | A = 2.131<br>B = 0.660<br>C = -0.064<br>$\sigma$ = 5.065 |
| LDRWM Tmax          | A = 0.997<br>B = 0.849<br>C = -0.152<br>$\sigma$ = 5.471  | A = 0.772<br>B = 0.898<br>C = -0.096<br>$\sigma$ = 3.001 | A = 1.04<br>B = 0.836<br>C = -0.159<br>$\sigma$ = 5.190   | A = 0.923<br>B = 0.871<br>C = -0.116<br>$\sigma$ = 2.056 | A = 1.08<br>B = 0.829<br>C = -0.084<br>$\sigma$ = 4.105  |                                                          | A = 1.030<br>B = 0.874<br>C = -0.149<br>$\sigma$ = 5.465 | A = 1.324<br>B = 0.848<br>C = -0.164<br>$\sigma$ = 4.343 | A = 2.978<br>B = 0.444<br>C = -0.055<br>$\sigma$ = 5.110 | A = 1.551<br>B = 0.747<br>C = -0.018<br>$\sigma$ = 3.287 |
| LNМ TTP             | A = -0.032<br>B = 0.970<br>C = -0.004<br>$\sigma$ = 1.437 | A = 0.770<br>B = 0.831<br>C = -0.012<br>$\sigma$ = 3.467 | A = -0.036<br>B = 0.964<br>C = -0.009<br>$\sigma$ = 1.528 | A = 0.892<br>B = 0.809<br>C = -0.030<br>$\sigma$ = 3.266 | A = 1.228<br>B = 0.736<br>C = -0.014<br>$\sigma$ = 2.754 | A = 0.877<br>B = 0.780<br>C = 0.014<br>$\sigma$ = 3.656  |                                                          | A = 0.770<br>B = 0.885<br>C = -0.044<br>$\sigma$ = 3.372 | A = 1.819<br>B = 0.694<br>C = -0.022<br>$\sigma$ = 2.967 | A = 1.051<br>B = 0.893<br>C = -0.052<br>$\sigma$ = 5.046 |
| LNМ Tmax            | A = -0.022<br>B = 0.935<br>C = -0.007<br>$\sigma$ = 4.064 | A = 0.375<br>B = 0.871<br>C = 0.010<br>$\sigma$ = 3.597  | A = 0.008<br>B = 0.923<br>C = -0.015<br>$\sigma$ = 3.961  | A = 0.408<br>B = 0.865<br>C = -0.002<br>$\sigma$ = 2.881 | A = 1.032<br>B = 0.738<br>C = -0.006<br>$\sigma$ = 4.258 | A = 0.406<br>B = 0.832<br>C = 0.044<br>$\sigma$ = 3.359  | A = 0.010<br>B = 0.964<br>C = -0.004<br>$\sigma$ = 3.878 |                                                          | A = 2.467<br>B = 0.592<br>C = -0.060<br>$\sigma$ = 4.680 | A = 1.501<br>B = 0.837<br>C = -0.077<br>$\sigma$ = 4.098 |
| RLCFM TTP           | A = 1.402<br>B = 0.745<br>C = -0.001<br>$\sigma$ = 2.815  | A = 2.659<br>B = 0.521<br>C = -0.052<br>$\sigma$ = 4.952 | A = 0.320<br>B = 0.901<br>C = -0.018<br>$\sigma$ = 2.885  | A = 0.169<br>B = 0.912<br>C = -0.051<br>$\sigma$ = 5.915 | A = 1.607<br>B = 0.678<br>C = -0.187<br>$\sigma$ = 4.680 | A = 1.093<br>B = 0.790<br>C = -0.162<br>$\sigma$ = 7.466 | A = 0.466<br>B = 0.835<br>C = -0.038<br>$\sigma$ = 2.782 | A = 0.183<br>B = 0.853<br>C = -0.024<br>$\sigma$ = 5.025 |                                                          | A = 1.363<br>B = 0.715<br>C = -0.003<br>$\sigma$ = 4.411 |
| RLCFM Tmax          | A = 0.460<br>B = 0.968<br>C = -0.022<br>$\sigma$ = 4.824  | A = 1.458<br>B = 0.794<br>C = -0.044<br>$\sigma$ = 3.573 | A = 0.229<br>B = 0.965<br>C = -0.087<br>$\sigma$ = 3.502  | A = 0.707<br>B = 0.861<br>C = -0.149<br>$\sigma$ = 2.430 | A = 2.035<br>B = 0.635<br>C = -0.262<br>$\sigma$ = 3.621 | A = 1.869<br>B = 0.690<br>C = -0.261<br>$\sigma$ = 3.374 | A = 0.379<br>B = 0.894<br>C = -0.102<br>$\sigma$ = 3.575 | A = 0.537<br>B = 0.833<br>C = -0.110<br>$\sigma$ = 3.341 | A = 0.315<br>B = 0.995<br>C = -0.095<br>$\sigma$ = 6.166 |                                                          |

**Note:**—  $V_T$ , indicates template volume;  $V_R$ , reference volume.
